# Supplementary material for: Introducing the DizzyQuest: an app-based diary for vestibular disorders
Source: Springer Nature journal article supplement (doi:10.1007/s00415-020-10092-2), 2020-07-25
Supplement: MOESM1 [file 18214712]

## **Introducing the DizzyQuest: An app-based diary for vestibular disorders**

### ***Journal of Neurology***

E.C. Martin<sup>1</sup>, C. Leue<sup>2</sup>, P. Delespaul<sup>2</sup>, F. Peeters<sup>3</sup>, A.M.L. Janssen<sup>4,5</sup>, R. Lousberg<sup>2</sup>, A. Erdkamp<sup>6</sup>, S. van de Weijer<sup>6</sup>, J. Widdershoven<sup>1</sup>, H. Blom<sup>7</sup>, T. Bruintjes<sup>8</sup>, A. Zwergal<sup>9</sup>, E. Grill<sup>10</sup>, N. Guinand<sup>11</sup>, A. Perez-Fornos<sup>11</sup>, M.R. van de Berg<sup>1</sup>, J. Stultiens<sup>1</sup>, H. Kingma<sup>1, 12</sup>, R. van de Berg<sup>1, 12</sup>

Corresponding author: R. van de Berg, raymond.vande.berg@mumc.nl

<sup>1</sup> Division of Balance Disorders, Department of Otorhinolaryngology and Head and Neck Surgery, Maastricht University Medical Center+, Maastricht, Netherlands

<sup>2</sup> Department of Psychiatry and Neuropsychology, School for Mental Health and Neuroscience, Maastricht University Medical Center+, Maastricht, Netherlands

<sup>3</sup> Department of Clinical Psychological Science, Faculty of Psychology and Neuroscience, Maastricht University

<sup>4</sup> Department of ENT/Audiology, School for Mental Health and Neuroscience (MHENS), Maastricht University Medical Centre, Maastricht, Netherlands.

<sup>5</sup> Department of Methodology and Statistics, Care and Public Health Research Institute (CAPHRI), Maastricht University, Maastricht, Netherlands,

<sup>6</sup> mHealth, Maastricht University Medical Center+, Maastricht, Netherlands

<sup>7</sup> Department of ENT, HagaZiekenhuis, The Hague.

<sup>8</sup> Apeldoorns duizeligheidscentrum, Gelre ziekenhuizen, Apeldoorn

<sup>9</sup> Department of Neurology, Ludwig-Maximilians-University of Munich

<sup>10</sup> Department of Medical Informatics, Ludwig-Maximilians-University of Munich

<sup>11</sup> Service of Otorhinolaryngology Head and Neck Surgery, Department of Clinical Neurosciences, Geneva University Hospitals, Geneva, Switzerland.

<sup>12</sup> Faculty of Physics, Tomsk State Research University, Tomsk, Russia

## 1.1 Morning Questionnaire

| Question                                                | Scoring system         | Answer options                                                                                                                                                                                                                |
|---------------------------------------------------------|------------------------|-------------------------------------------------------------------------------------------------------------------------------------------------------------------------------------------------------------------------------|
| How long did it take before I fell asleep last night    | Multiple choice option | <ol style="list-style-type: none"> <li>1. 0-5 min</li> <li>2. 5-15 min</li> <li>3. 15-30 min</li> <li>4. 30-45 min</li> <li>5. 45m-1 hour</li> <li>6. 1-2 hour</li> <li>7. 2-4 hours</li> <li>8. More than 4 hours</li> </ol> |
| How long did I sleep?                                   | Multiple choice option | <ol style="list-style-type: none"> <li>1. &lt;3 hours</li> <li>2. 3-5 hours</li> <li>3. 5-8 hours</li> <li>4. &gt;8 hours</li> </ol>                                                                                          |
| How often did I wake up last night                      | Multiple choice option | <ol style="list-style-type: none"> <li>1. 0</li> <li>2. 1</li> <li>3. 2</li> <li>4. 3</li> <li>5. 4</li> <li>6. 5</li> <li>7. More than 5 times</li> </ol>                                                                    |
| How long did I lie awake this morning before getting up | Multiple choice option | <ol style="list-style-type: none"> <li>1. 0-5min</li> <li>2. 5-15min</li> <li>3. 15-30min</li> <li>4. 30-45min</li> <li>5. 45m-1hour</li> <li>6. 1-2hours</li> <li>7. 2-4hours</li> <li>8. More than 4 hours</li> </ol>       |
| I slept well                                            | Likert scale           | 1 = Not at all<br>4 = Moderate<br>7 = Very                                                                                                                                                                                    |
| I feel rested                                           | Likert scale           | 1 = Not at all<br>4 = Moderate<br>7 = Very                                                                                                                                                                                    |
| I am looking forward to today                           | Likert scale           | 1 = Not at all<br>4 = Moderate<br>7 = Very                                                                                                                                                                                    |

## 1.2 Within-Day Questionnaire

| Question       | Scoring system | Answer options                             |
|----------------|----------------|--------------------------------------------|
| I feel relaxed | Likert scale   | 1 = Not at all<br>4 = Moderate<br>7 = Very |

|                                         |                                            |                                                                                                                                                                                                                                                                   |
|-----------------------------------------|--------------------------------------------|-------------------------------------------------------------------------------------------------------------------------------------------------------------------------------------------------------------------------------------------------------------------|
| I feel cheerful                         | Likert scale                               | 1 = Not at all<br>4 = Moderate<br>7 = Very                                                                                                                                                                                                                        |
| I feel irritated                        | Likert scale                               | 1 = Not at all<br>4 = Moderate<br>7 = Very                                                                                                                                                                                                                        |
| I feel confident                        | Likert scale                               | 1 = Not at all<br>4 = Moderate<br>7 = Very                                                                                                                                                                                                                        |
| I'm worrying about things               | Likert scale                               | 1 = Not at all<br>4 = Moderate<br>7 = Very                                                                                                                                                                                                                        |
| I feel anxious                          | Likert scale                               | 1 = Not at all<br>4 = Moderate<br>7 = Very                                                                                                                                                                                                                        |
| I feel tired                            | Likert scale                               | 1 = Not at all<br>4 = Moderate<br>7 = Very                                                                                                                                                                                                                        |
| I generally feel well at the moment     | Likert scale                               | 1 = Not at all<br>4 = Moderate<br>7 = Very                                                                                                                                                                                                                        |
| I am able to concentrate well           | Likert scale                               | 1 = Not at all<br>4 = Moderate<br>7 = Very                                                                                                                                                                                                                        |
| I feel in control                       | Likert scale                               | 1 = Not at all<br>4 = Moderate<br>7 = Very                                                                                                                                                                                                                        |
| What am I doing (just before the beep)? | Multiple choice option (maximum 3 options) | <ol style="list-style-type: none"> <li>1. Resting</li> <li>2. Work, school</li> <li>3. Housekeeping, shopping</li> <li>4. Hygiene</li> <li>5. Eating, drinking</li> <li>6. Active relaxation</li> <li>7. Passive relaxation</li> <li>8. Something else</li> </ol> |
| I feel I'm being active                 | Likert scale                               | 1 = Not at all<br>4 = Moderate<br>7 = Very                                                                                                                                                                                                                        |
| I can do this well                      | Likert scale                               | 1 = Not at all<br>4 = Moderate<br>7 = Very                                                                                                                                                                                                                        |
| I'd rather be doing something else      | Likert scale                               | 1 = Not at all<br>4 = Moderate<br>7 = Very                                                                                                                                                                                                                        |
| Where am I?                             | Multiple choice option                     | <ol style="list-style-type: none"> <li>1) At home</li> <li>2) At someone's home</li> <li>3) Work, school</li> <li>4) Public place</li> <li>5) Transport</li> <li>6) Somewhere else</li> </ol>                                                                     |

|                                                                                                                                |                                                |                                                                                                                                                                                                                                                                                                                                                                                                                                                                                   |
|--------------------------------------------------------------------------------------------------------------------------------|------------------------------------------------|-----------------------------------------------------------------------------------------------------------------------------------------------------------------------------------------------------------------------------------------------------------------------------------------------------------------------------------------------------------------------------------------------------------------------------------------------------------------------------------|
| Who am I with?                                                                                                                 | Multiple choice option<br>(maximum 3 options)  | <ol style="list-style-type: none"> <li>1. Partner</li> <li>2. Family resident</li> <li>3. Family non resident</li> <li>4. Friends</li> <li>5. Colleagues</li> <li>6. Acquaintances</li> <li>7. Strangers, others</li> <li>8. Nobody</li> </ol>                                                                                                                                                                                                                                    |
| I like this (social situation)                                                                                                 | Likert scale                                   | <p>1 = Not at all</p> <p>4 = Moderate</p> <p>7 = Very</p>                                                                                                                                                                                                                                                                                                                                                                                                                         |
| I have an attack at this moment                                                                                                | Multiple choice option                         | <p>1= yes</p> <p>2 = no</p>                                                                                                                                                                                                                                                                                                                                                                                                                                                       |
| Since the last beep I have had an attack                                                                                       | Multiple choice option                         | <p>1 = yes</p> <p>2 = no</p>                                                                                                                                                                                                                                                                                                                                                                                                                                                      |
| Since the last beep I have used                                                                                                | Multiple choice option<br>(maximum 7 options)  | <ol style="list-style-type: none"> <li>1. Caffeine</li> <li>2. Nicotine</li> <li>3. Alcohol</li> <li>4. Medication</li> <li>5. Tea</li> <li>6. Chocolate</li> <li>7. Other substance</li> <li>8. Nothing of these</li> </ol>                                                                                                                                                                                                                                                      |
| I now suffer from                                                                                                              | Multiple choice option<br>(maximum 13 options) | <ol style="list-style-type: none"> <li>1. Dizziness</li> <li>2. Nausea</li> <li>3. Imbalance</li> <li>4. Hearing loss</li> <li>5. Tinnitus</li> <li>6. Aural fullness</li> <li>7. Headache</li> <li>8. Sensitive to light</li> <li>9. Sensitive to sounds</li> <li>10. Light flashes, zigzag lines</li> <li>11. Numbness or tingling in arms, legs and-or face</li> <li>12. Visual problems when moving</li> <li>13. Difficulty reading</li> <li>14. None of the above</li> </ol> |
| <i>If one of more symptoms are selected, the subject is then asked to indicate the severity of those symptoms individually</i> | Likert scale                                   | <p>1 = Not at all</p> <p>4 = Moderate</p> <p>7 = Very</p>                                                                                                                                                                                                                                                                                                                                                                                                                         |
| <i>Think about the most important thing that has happened since the last beep</i>                                              | No answer option                               |                                                                                                                                                                                                                                                                                                                                                                                                                                                                                   |
| This event was                                                                                                                 | Likert scale                                   | <p>-3 = stressful</p> <p>+3 = relaxing</p>                                                                                                                                                                                                                                                                                                                                                                                                                                        |
| This beep bothered me                                                                                                          | Likert scale                                   | 1 = Not at all                                                                                                                                                                                                                                                                                                                                                                                                                                                                    |

|  |  |                          |
|--|--|--------------------------|
|  |  | 4 = Moderate<br>7 = Very |
|--|--|--------------------------|

### 1.3 Evening Questionnaire

| Question                                       | Scoring system | Answer options                             |
|------------------------------------------------|----------------|--------------------------------------------|
| This was an ordinary day                       | Likert scale   | 1 = Not at all<br>4 = Moderate<br>7 = Very |
| I generally felt well today                    | Likert scale   | 1 = Not at all<br>4 = Moderate<br>7 = Very |
| I generally felt tired today                   | Likert scale   | 1 = Not at all<br>4 = Moderate<br>7 = Very |
| I generally felt relaxed today                 | Likert scale   | 1 = Not at all<br>4 = Moderate<br>7 = Very |
| I generally worried a lot today                | Likert scale   | 1 = Not at all<br>4 = Moderate<br>7 = Very |
| I generally was able to concentrate well today | Likert scale   | 1 = Not at all<br>4 = Moderate<br>7 = Very |
| I felt dizzy today                             | Likert scale   | 1 = Not at all<br>4 = Moderate<br>7 = Very |
| I felt nauseous today                          | Likert scale   | 1 = Not at all<br>4 = Moderate<br>7 = Very |
| I had balance issues today                     | Likert scale   | 1 = Not at all<br>4 = Moderate<br>7 = Very |
| Today I suffered from hearing loss: left       | Likert scale   | 1 = Not at all<br>4 = Moderate<br>7 = Very |
| Today I suffered from hearing loss: right      | Likert scale   | 1 = Not at all<br>4 = Moderate<br>7 = Very |
| Today I suffered from tinnitus: left           | Likert scale   | 1 = Not at all<br>4 = Moderate<br>7 = Very |
| Today I suffered from tinnitus: right          | Likert scale   | 1 = Not at all<br>4 = Moderate<br>7 = Very |
| Today I suffered from aural fullness           | Likert scale   | 1 = Not at all<br>4 = Moderate<br>7 = Very |
| Today I suffered from headache                 | Likert scale   | 1 = Not at all<br>4 = Moderate             |

|                                                                               |                                             |                                                                                                                                                   |
|-------------------------------------------------------------------------------|---------------------------------------------|---------------------------------------------------------------------------------------------------------------------------------------------------|
|                                                                               |                                             | 7 = Very                                                                                                                                          |
| Today I suffered from light-sensitivity                                       | Likert scale                                | 1 = Not at all<br>4 = Moderate<br>7 = Very                                                                                                        |
| Today I suffered from sound-sensitivity                                       | Likert scale                                | 1 = Not at all<br>4 = Moderate<br>7 = Very                                                                                                        |
| Today I suffered from light flashes and/or zigzag lines                       | Likert scale                                | 1 = Not at all<br>4 = Moderate<br>7 = Very                                                                                                        |
| Today I suffered from numbness or tingling in arms, legs and/or face          | Likert scale                                | 1 = Not at all<br>4 = Moderate<br>7 = Very                                                                                                        |
| Today I suffered from visual problems when moving                             | Likert scale                                | 1 = Not at all<br>4 = Moderate<br>7 = Very                                                                                                        |
| Today I suffered from difficulties reading                                    | Likert scale                                | 1 = Not at all<br>4 = Moderate<br>7 = Very                                                                                                        |
| How many attacks of dizziness, nausea and/or hearing loss have you had today? | Multiple choice option                      | - 0<br>- 1<br>- 2<br>- 3 or more                                                                                                                  |
| Did the first attack today already start yesterday?                           | Multiple choice option                      | - Yes<br>- No                                                                                                                                     |
| The attacks were provoked by:                                                 | Multiple choice option (maximum 5 options)  | - Head or body movements<br>- Strong stimuli (visual, sound, busy places)<br>- Stress<br>- Nothing, started spontaneously<br>- Something else:... |
| <i>If chosen 'Something else:...' What else provoked the attack?</i>          | Open answer option (maximum 120 characters) |                                                                                                                                                   |
| I was unable to function properly because of the attacks for:                 | Multiple choice option                      | 1. <20 minutes<br>2. 20 minutes – 3 hours<br>3. 3 hours – 12 hours<br>4. >12 hours                                                                |
| To what extent were you limited in your activities today?                     | Likert scale                                | 1 = Not at all<br>4 = Moderate<br>7 = Very                                                                                                        |
| In which type of activities were you limited the most today?                  | Multiple choice option (maximum 1 option)   | 1. Work, study<br>2. Household<br>3. Social<br>4. Travelling, on the way<br>5. Hobbies<br>6. Sports<br>7. Sleeping                                |

## 1.4 Attack Questionnaire

| Question                                                                             | Scoring system                                 | Answer options                                                                                                                                                                                                                                                                                                                                                                                                                                     |
|--------------------------------------------------------------------------------------|------------------------------------------------|----------------------------------------------------------------------------------------------------------------------------------------------------------------------------------------------------------------------------------------------------------------------------------------------------------------------------------------------------------------------------------------------------------------------------------------------------|
| This attack has stopped since                                                        | Multiple choice option                         | <ol style="list-style-type: none"> <li>1. Happening now</li> <li>2. &lt;20 minutes</li> <li>3. 20 minutes – 3 hours</li> <li>4. 3 hours -12 hours</li> <li>5. &gt;12 hours</li> <li>6. Yesterday or earlier</li> </ol>                                                                                                                                                                                                                             |
| During this attack I suffered from                                                   | Multiple choice option<br>(maximum 13 options) | <ol style="list-style-type: none"> <li>1. Dizziness</li> <li>2. Nausea</li> <li>3. Imbalance</li> <li>4. Hearing loss</li> <li>5. Tinnitus</li> <li>6. Aural fullness</li> <li>7. Headache</li> <li>8. Sensitive to light</li> <li>9. Sensitive to sounds</li> <li>10. Light flashes, zigzag lines</li> <li>11. Numbness or tingling in arms, legs and-or face</li> <li>12. Visual problems when moving</li> <li>13. Difficulty reading</li> </ol> |
| This attack was provoked by                                                          | Multiple choice option<br>(maximum 5 options)  | <ol style="list-style-type: none"> <li>1. Arose automatically</li> <li>2. Head or body movements</li> <li>3. Strong stimuli (visual, sound, busy places)</li> <li>4. Stress</li> <li>5. Something else:...</li> </ol>                                                                                                                                                                                                                              |
| <i>If chosen 'Something else:...'</i><br>What other reason was there for the attack? | Open answer option<br>(Maximum 60 characters)  |                                                                                                                                                                                                                                                                                                                                                                                                                                                    |
| How severe was this attack?                                                          | Likert scale                                   | <p>1 = Very mild<br/>7 = Very severe</p>                                                                                                                                                                                                                                                                                                                                                                                                           |
| This attack prevented me from functioning normally for                               | Multiple choice option                         | <ol style="list-style-type: none"> <li>1. &lt;20 minutes</li> <li>2. 20 minutes – 3 hours</li> <li>3. 3 hours – 12 hours</li> <li>4. 12 hours – 1 day</li> <li>5. 1 to 3 days</li> <li>6. &gt;3 days</li> </ol>                                                                                                                                                                                                                                    |
